# Supplementary material for: Polarized SCAR and the Arp2/3 complex regulate apical cortical remodeling in asymmetrically dividing neuroblasts
Source: PubMed Central journal article supplement (PMC10331462; doi:10.1016/j.isci.2023.107129), 2023-06-15
Supplement: mmc1.pdf [file mmc1.pdf]

iScience, Volume 26

## **Supplemental information**

**Polarized SCAR and the Arp2/3 complex  
regulate apical cortical remodeling  
in asymmetrically dividing neuroblasts**

**Giulia Cazzagon, Chantal Roubinet, and Buzz Baum**

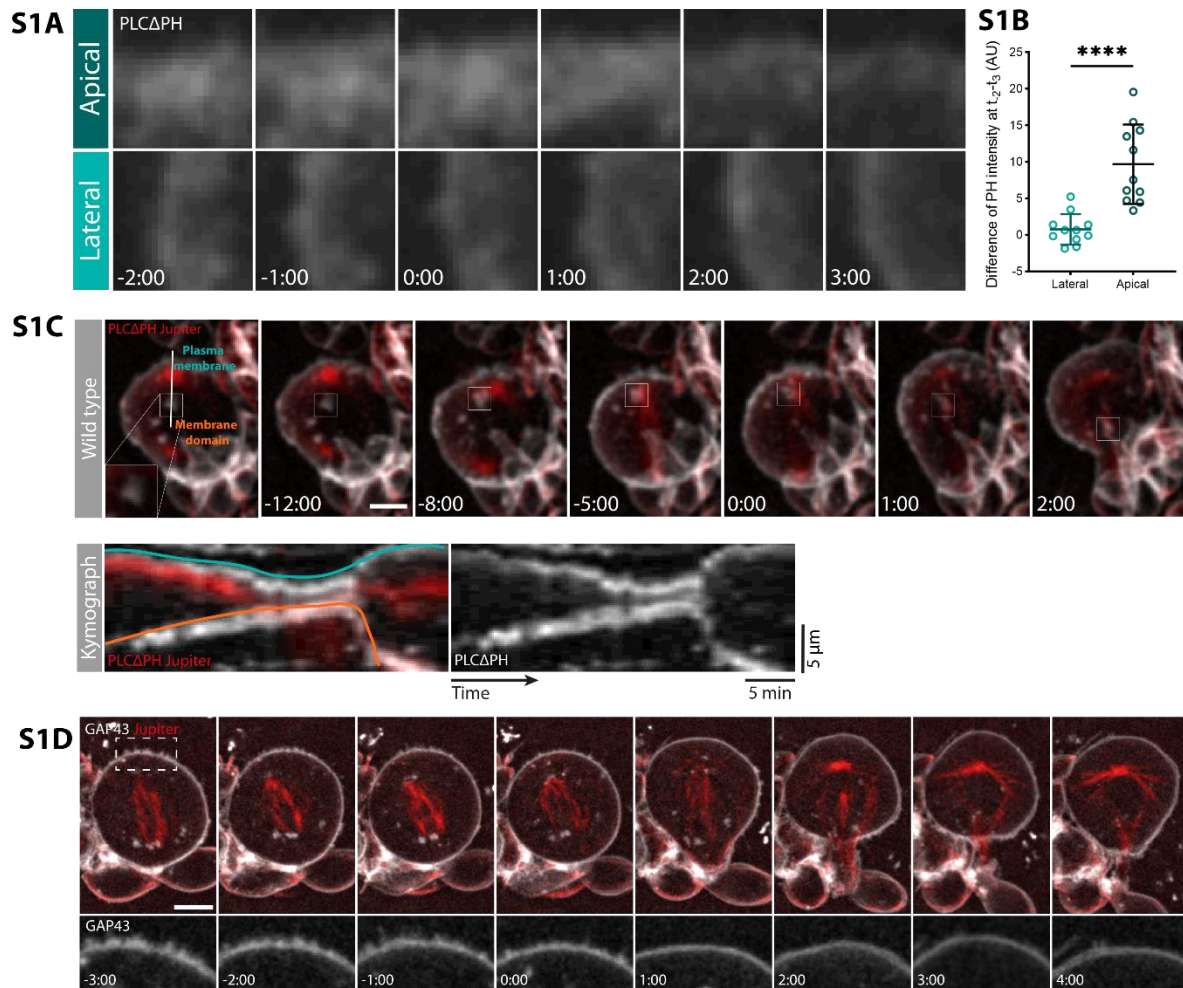

**Figure S1. The apical plasma membrane is remodelled as neuroblasts progress through mitosis, related to Figure 1. A.** Images show a zoom in of the apical and lateral membrane of a wild-type neuroblast expressing UAS-PLCΔPH::GFP. **B.** Plot showing difference of PH intensity between  $t = -2$ min and  $t = 3$ min in both lateral and apical membrane domains. Asterisk (\*\*\*\*) denote statistical significance.  $P \leq 0.0001$  (paired t-test). Central and error bars: mean and SD. **C.** Maximum intensity z-projection of dividing neuroblast expressing membrane marker, UAS-PLCΔPH::GFP and a microtubule marker UAS-mCherry::Jupiter, both expressed via Wor-GAL4/UAS. The white line indicates the position used to generate the kymograph. Kymograph shows the movement of the plasma membrane (blue) and of a more basal PH::GFP-rich membrane domain (orange). **D.** High resolution imaging of neuroblast expressing membrane marker, mCherry::GAP43, driven by sqh promoter. Insert shows membrane protrusions at the apical side of the cell in metaphase (-3:00 to -1:00 min). Apical protrusions begin to disappear as cells enter anaphase. Scale bars = 5 μm.

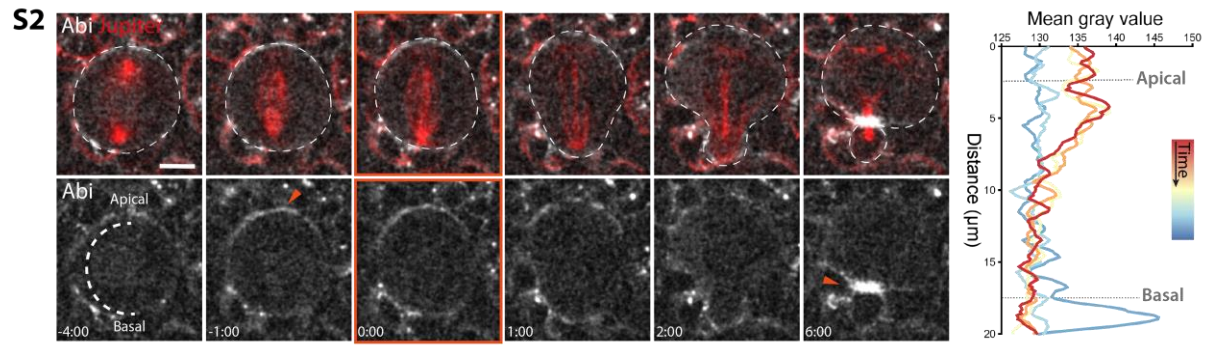

**Figure S2. A second component of the SCAR complex, Abi, localizes at the apical side of the neuroblast at metaphase and the furrow at cytokinesis, related to Figure 2.** Representative super-resolution images of neuroblast expressing *ubi-mCherry::Abi*. Arrowheads point to Abi localization at the apical cortex in metaphase and at the furrow at cytokinesis. Mean Abi signal intensity at each timepoint was acquired by drawing a line around the cortex from the apical to the basal side, as depicted at time -4:00 relative to anaphase onset. These values were then plotted in graphs on the right. Scale bar = 5  $\mu\text{m}$ .

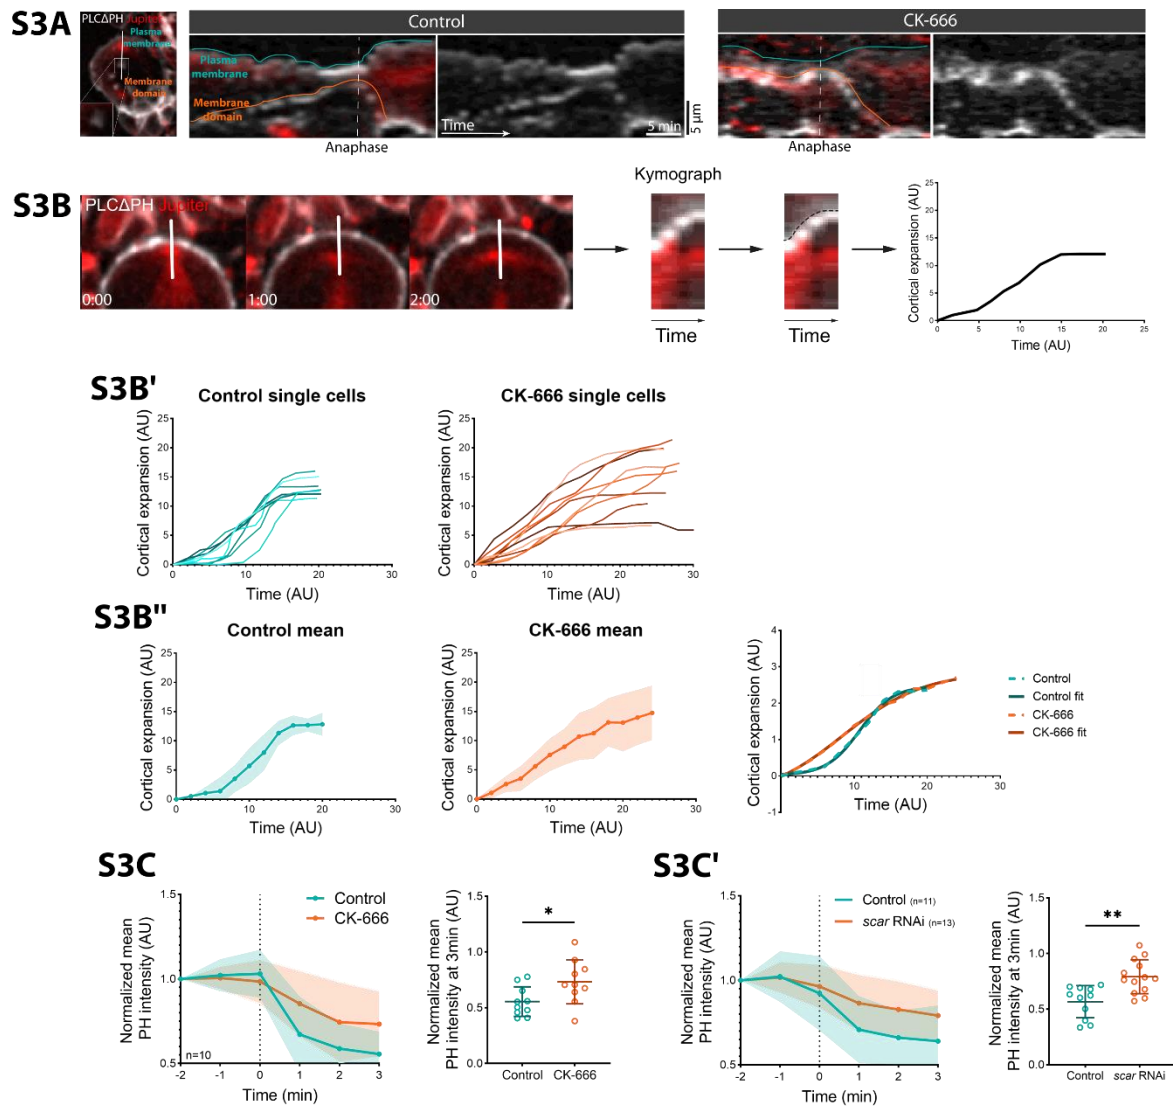

**Figure S3. Arp2/3 and SCAR are required for the normal remodelling of the apical membrane in neuroblasts at the onset of anaphase, related to Figure 3. A.** Representative kymographs of control (CK-689 treatment) and CK-666 treated cells expressing PLCΔPH::GFP and mCherry::Jupiter as they progress from prophase to cytokinesis. Lines indicate the movement of the apical plasma membrane (blue lines) and the movement of PLCΔPH::GFP punctae (orange lines). The cell shown on the left is an example of a maximum intensity z-projection of a dividing neuroblast in which the white line indicates the position used to generate the kymograph. **B.** Schematics showing how the kymograph and plots in B'-B'' were obtained. In brief, a line drawn on the movie was used to generate a kymograph from which coordinates were manually tracked, exported and plotted to follow the movement of the membrane (graph on the right). **B'-B''** Graphs show single cells tracks (B') and mean path (B'') of membrane expansion during anaphase for control (CK-689) and CK-666 treated cells. Coordinates were centred to start at (x=0, y=0), and a linear interpolation of the x set of coordinates was performed. Graphs on the right show curves for mean cortical expansion for control and CK666 treated cells with their fitted curves: the control curve is fitted best by a linear regression, and the treatment curve is fitted best by a sigmoid. n=10. **C.** Plots show changes in PLCΔPH::GFP intensity during metaphase-anaphase transition in control (CK-689) and CK-666 treated cells, and statistically significant difference between PH intensity at the last time point (3 min). n=10. t-test: \*P ≤ 0.0001. **C'.** Plot showing changes in PLCΔPH::GFP intensity during metaphase-anaphase transition in Control and Scar RNAi cells, and statistically significant difference between PH intensity at the last time point (3 min). n control=11, n RNAi=13. T-test: \*\*P ≤ 0.01. Central and error bars = mean and standard deviation.

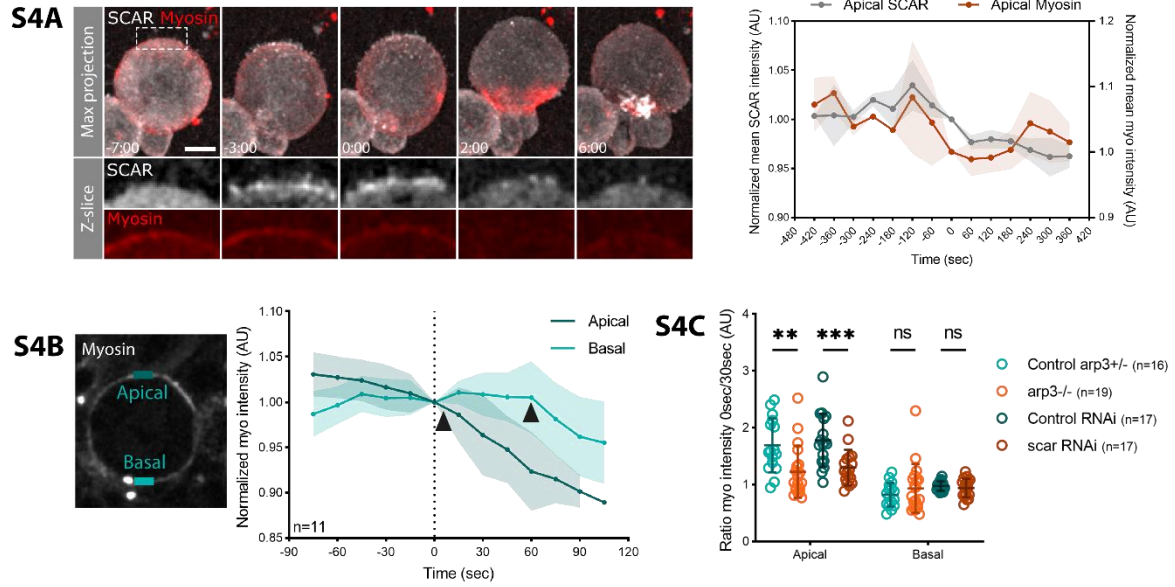

**Figure S4. Apical Myosin dynamics at the metaphase-anaphase transition, related to Figure 4.**  
**A.** Representative images of dissociated neuroblast cells expressing both UAS-SCAR::GFP and the non-muscle Myosin II marker, UAS-Sqh::cherry, under the control of Wor-GAL4. Inserts show apical SCAR and Myosin signals separately. Graph on the right shows SCAR and Myosin apical intensities during neuroblast division, with anaphase onset indicated by  $t=0$ . **B.** Graph shows changes in apical and basal Myosin intensity before and after anaphase onset ( $t=0$ ) measured in cells expressing the Myosin marker, Sqh::GFP. Arrowheads mark the approximate times at which Myosin starts to be cleared. **C.** Graph shows the ratio of Myosin intensity at anaphase onset (0 sec) versus 30 seconds later in both apical and basal domains in CK-666 treated cells, and SCAR RNAi cells and in their respective controls (Tukey's multiple comparison test). ns, not significant,  $P > 0.05$ ,  $**P \leq 0.01$ ,  $***P \leq 0.001$ . Scale bar = 5  $\mu\text{m}$ . Central and error bars = mean and standard deviation.



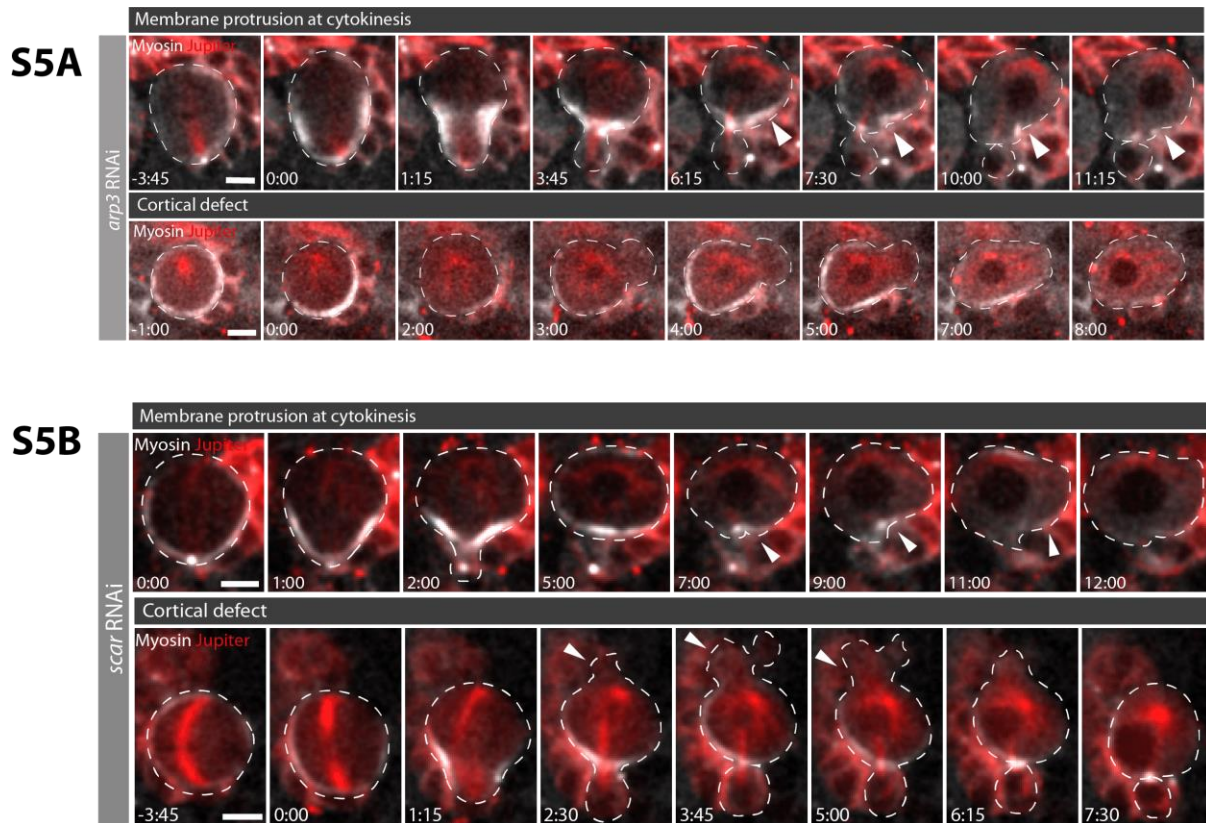

**Figure S5. RNAi mediated silencing of either *arp3* or *scar* leads to cortical defects and membrane instability in neuroblasts undergoing cytokinesis, related to Figure 5.** Time-lapse image of representative neuroblasts expressing the Myosin marker *Sqh::GFP* along with the microtubule marker *cherry::Jupiter*. **A.** Cells expressing dsRNA targeting the *arp3* subunit of the Arp2/3 complex. **B.** Cells expressing dsRNAs targeting *scar*. Panels on top show an example of a membrane protrusion phenotype at cytokinesis. Panels on the bottom show example of cortical defects, including blebbing. Scale bar = 5  $\mu$ m.
